# Supplementary material
Source: publisher figshare collection journal article supplement (https://acs.figshare.com/ndownloader/files/17670581)
Supplement: Supplementary file 1 [file 17670581]

## Sheet: CellTiter-Glo
Gene Symbol	Fold Change	Fold Change SEM	t	p	log2(Fold Change)
ACE	0.541076	0.0125215	-36.6507	4.46745e-05	-0.886096
AKAP11	1.24548	0.220782	1.11189	0.347273	0.316707
ARL6IP5	0.88915	0.0175449	-6.31806	0.0999329	-0.169501
ATP2A2	0.295001	0.0189533	-37.1966	0.0171109	-1.76121
ATP2B2	0.638527	0.0500553	-7.22147	0.00547518	-0.647179
ATP2B4	0.481143	0.116278	-4.46221	0.14035	-1.05546
CACNB4	0.495161	0.028221	-17.8888	0.000380946	-1.01403
CCL11	0.619656	0.0441384	-8.61709	0.00328643	-0.690462
CDC42EP4	0.621864	0.0233509	-16.1936	0.0392631	-0.68533
CDR2L	0.89117	0.115495	-0.942298	0.518907	-0.166228
CNTNAP3	0.574941	0.0263522	-16.1299	0.0394178	-0.798513
CUL3	0.65996	0.0357775	-9.5043	0.00246983	-0.59955
CXCL12	0.882462	0.0725785	-1.61946	0.203786	-0.180394
DEFB115	0.856131	0.141624	-1.01586	0.384498	-0.224097
DERL2	0.700638	0.0362714	-8.25339	0.00372464	-0.51326
DNMBP	0.780012	0.0338364	-6.50152	0.0971572	-0.358432
EPOR	0.694828	0.0744912	-4.09675	0.0263053	-0.525271
EPX	1.2376	0.154542	1.53741	0.221793	0.30754
GABRA6	0.683445	0.0785429	-4.03035	0.0274593	-0.549104
GMFG	0.583575	0.0328839	-12.6635	0.00106206	-0.77701
HDAC2	0.504005	0.0702851	-7.05691	0.00584912	-0.988491
HECTD2	0.840058	0.0978627	-1.63435	0.349566	-0.251439
HSPB8	0.761634	0.0750143	-3.1776	0.0501863	-0.39283
ITGB1	1.39163	0.272077	1.4394	0.245644	0.476774
ITGB3	1.4436	0.196374	2.25893	0.109034	0.529667
KIR2DL5A	0.727101	0.0462179	-5.90461	0.00970009	-0.459771
MB	0.505587	0.0555475	-8.90073	0.0712257	-0.98397
MCL1	0.756413	0.0375216	-6.49191	0.00742073	-0.402754
MTFR2	0.928706	0.0187489	-3.80258	0.163711	-0.106706
NELL2	0.959885	0.104112	-0.385303	0.765869	-0.0590659
NHLRC1	1.12361	0.0655203	1.88656	0.155683	0.168139
NOX4	0.877753	0.0606895	-2.0143	0.137411	-0.188113
NRD1	0.770466	0.0158123	-14.5162	0.0437867	-0.376197
NRF1	0.91236	0.0155466	-5.63722	0.111769	-0.132325
PEX5L	0.716631	0.110976	-2.55341	0.237633	-0.480697
PIK3C2G	0.606624	0.064184	-6.12888	0.102965	-0.721126
PINK1	0.739194	0.0315762	-8.25957	0.00371657	-0.435974
PKM	0.835298	0.0502807	-3.27564	0.188629	-0.259637
PLA2G16	0.56661	0.0558144	-7.76483	0.00444358	-0.819571
PLBD2	1.08923	0.109779	0.812837	0.475825	0.123312
PRDX4	1.48509	0.254822	1.90363	0.153084	0.570546
PRKAR1A	0.965523	0.0418777	-0.82328	0.470693	-0.0506176
PRKCE	0.729458	0.0163507	-16.5462	0.0384285	-0.455102
PSMA1	0.827318	0.0447793	-3.85629	0.0308097	-0.273486
PSMA6	1.35563	0.0643892	5.52311	0.0116924	0.438962
PSMA7	0.979325	0.114885	-0.179963	0.868651	-0.0301405
PSMB5	0.924423	0.0581473	-1.29975	0.284543	-0.113375
PSMC2	1.06883	0.147634	0.466252	0.672803	0.0960385
PSMD7	0.898673	0.0883875	-1.1464	0.456646	-0.154132
PTPN6	1.25617	0.0618241	4.1435	0.0255302	0.329029
RAB11A	1.81443	0.289253	2.81562	0.0669805	0.859514
RANBP9	0.388195	0.0376972	-16.2295	0.000508924	-1.36515
RELT	0.565386	0.0454056	-9.5718	0.00241926	-0.822691
ROCK1	0.68167	0.0207076	-15.3726	0.0413544	-0.552855
SAA2	0.654849	0.027823	-12.4053	0.00112872	-0.610765
SERPINA4	1.44284	0.157826	2.80588	0.217953	0.528911
SLC36A1	0.965003	0.223646	-0.156485	0.90118	-0.0513949
SPCS3	1.47256	0.239225	1.97537	0.298335	0.558323
SSTR5	1.17377	0.222266	0.781834	0.577561	0.231156
ST6GAL1	0.458226	0.0141923	-38.1738	0.0166731	-1.12587
TNFAIP3	0.875959	0.0446815	-2.77611	0.0692148	-0.191064
TNFSF13B	0.887598	0.0376679	-2.98402	0.205855	-0.172021
TOMM7	0.760608	0.0508477	-4.70801	0.018137	-0.394774
TPCN1	0.675394	0.0354405	-9.15918	0.00275151	-0.566199
TPTE2	0.856694	0.0682245	-2.1005	0.282867	-0.223147
UBE2F	0.776082	0.0410279	-5.4577	0.0120863	-0.365719
UBXN1	1.01555	0.131269	0.118448	0.913199	0.0222592
UCK2	0.556793	0.06729	-6.58652	0.0959225	-0.844787
UFD1L	1.01666	0.212546	0.0783846	0.950201	0.0238378
USP5	0.712665	0.14237	-2.01822	0.136891	-0.488705
VNN2	0.964978	0.103525	-0.338294	0.792329	-0.0514316
VSIG2	0.572852	0.0445133	-9.59595	0.0024015	-0.803765
ZRANB1	1.51807	0.219902	2.35589	0.0997707	0.602235

## Sheet: LDH
Gene Symbol	Fold Change	Fold Change SEM	t	p	log2(Fold Change)
ACE	2.48384	0.686696	2.16085	0.11948	1.31257
AKAP11	0.951512	0.058916	-0.823009	0.470826	-0.0717068
ARL6IP5	1.16873	0.177831	0.948839	0.516709	0.224946
ATP2A2	13.9325	1.36558	9.47034	0.0669743	3.80038
ATP2B2	1.27785	0.132309	2.09999	0.126566	0.353716
ATP2B4	0.999903	0.097287	-0.00100045	0.999363	-0.000140426
CACNB4	1.20356	0.101561	2.00436	0.138739	0.267313
CCL11	1.98575	0.194547	5.06688	0.0148413	0.989683
CDC42EP4	0.823299	0.125727	-1.40543	0.393697	-0.280512
CDR2L	0.898924	0.151228	-0.668368	0.624917	-0.153729
CNTNAP3	12.179	4.57581	2.44306	0.247338	3.60632
CUL3	1.95902	0.113827	8.4252	0.00350859	0.97013
CXCL12	0.653564	0.0375255	-9.23202	0.00268865	-0.6136
DEFB115	1.08449	0.0747506	1.13028	0.340558	0.117016
DERL2	0.723875	0.0745495	-3.70391	0.0341852	-0.466187
DNMBP	0.777709	0.0817913	-2.71779	0.224455	-0.362698
EPOR	1.18024	0.0460745	3.912	0.0296828	0.239085
EPX	1.03471	0.0964508	0.359825	0.742817	0.04922
GABRA6	2.27722	0.678326	1.8829	0.156247	1.18727
GMFG	2.26532	0.203387	6.22124	0.00837242	1.17971
HDAC2	1.23432	0.0656122	3.57133	0.0375166	0.30372
HECTD2	0.953195	0.182482	-0.25649	0.840159	-0.0691562
HSPB8	1.05873	0.0871224	0.674053	0.548567	0.082328
ITGB1	0.690138	0.0926088	-3.34593	0.0441923	-0.535044
ITGB3	0.914511	0.0783485	-1.09113	0.355009	-0.128927
KIR2DL5A	1.31701	0.110358	2.87257	0.0639159	0.397269
MB	1.51596	0.104314	4.94617	0.126998	0.600229
MCL1	0.844535	0.197896	-0.785591	0.489439	-0.243771
MTFR2	0.555469	0.043824	-10.1435	0.062559	-0.848221
NELL2	1.06511	0.210106	0.309879	0.808699	0.090999
NHLRC1	1.34351	0.188219	1.82506	0.165483	0.426008
NOX4	0.71723	0.112745	-2.50804	0.0870877	-0.479492
NRD1	1.95066	0.237234	4.00726	0.155687	0.963961
NRF1	0.857337	0.145737	-0.978912	0.506784	-0.222066
PEX5L	3.90999	0.578321	5.0318	0.124892	1.96717
PIK3C2G	0.937352	0.0664126	-0.943308	0.518567	-0.0933364
PINK1	1.3656	0.325561	1.12297	0.34321	0.449531
PKM	0.935427	0.0492392	-1.31141	0.414744	-0.0963026
PLA2G16	1.5609	0.176969	3.16947	0.0505013	0.642377
PLBD2	0.673529	0.0682824	-4.78119	0.0173929	-0.570189
PRDX4	0.642621	0.0614967	-5.81135	0.0101433	-0.63796
PRKAR1A	1.22124	0.0976108	2.26656	0.108268	0.288347
PRKCE	0.830895	0.0888485	-1.9033	0.307973	-0.267262
PSMA1	0.431979	0.0354905	-16.0049	0.000530448	-1.21097
PSMA6	0.812626	0.0858115	-2.18355	0.116959	-0.299336
PSMA7	0.670236	0.175417	-1.87989	0.156712	-0.57726
PSMB5	0.724426	0.0756918	-3.64074	0.0357232	-0.46509
PSMC2	0.957928	0.0386571	-1.08834	0.356061	-0.0620112
PSMD7	0.923294	0.158449	-0.484106	0.712979	-0.115138
PTPN6	1.81753	0.215462	3.79432	0.0321284	0.861982
RAB11A	0.789159	0.0810383	-2.60174	0.0802552	-0.341611
RANBP9	1.59377	0.151458	3.92032	0.029519	0.67244
RELT	0.84806	0.106693	-1.42408	0.249619	-0.237761
ROCK1	1.78533	0.362398	2.16703	0.275238	0.836191
SAA2	1.27628	0.147063	1.87867	0.156901	0.351948
SERPINA4	1.26559	0.130727	2.03165	0.291187	0.339812
SLC36A1	1.04495	0.0510779	0.879941	0.540602	0.0634277
SPCS3	0.971636	0.181585	-0.156201	0.901356	-0.0415119
SSTR5	1.01297	0.0442163	0.293379	0.818327	0.0185945
ST6GAL1	4.87727	0.466275	8.31541	0.0761932	2.28607
TNFAIP3	1.45167	0.148404	3.04353	0.0557117	0.537716
TNFSF13B	0.949471	0.438091	-0.11534	0.926896	-0.0748044
TOMM7	1.36725	0.0799796	4.59183	0.0194054	0.45128
TPCN1	1.55273	0.159161	3.47275	0.0402659	0.634806
TPTE2	1.05938	0.0743043	0.799082	0.570803	0.0832137
UBE2F	1.16512	0.103452	1.5961	0.20874	0.220479
UBXN1	0.93448	0.0601705	-1.08891	0.355845	-0.097765
UCK2	0.916789	0.108019	-0.770335	0.58213	-0.125338
UFD1L	0.982468	0.0903966	-0.193944	0.878045	-0.0255176
USP5	1.02105	0.100129	0.210214	0.846969	0.0300514
VNN2	1.07168	0.0284426	2.52017	0.240479	0.0998742
VSIG2	1.53352	0.215577	2.47482	0.0896801	0.616843
ZRANB1	0.736369	0.0715215	-3.68603	0.0346117	-0.441499
